# Supplementary material for: Detection limit of intragenic deletions with targeted array comparative genomic hybridization
Source: PubMed Central journal article supplement (PMC4235222; doi:10.1186/1471-2156-14-116), 2013-12-05
Supplement: 1471-2156-14-116-S1.pdf [file 1471-2156-14-116-S1.pdf]

## Additional File 1

### Figure A

#### **Familial 2319-bp deletion encompassing exon 5 of the *HPRT1* gene.**

Cytosure displays of aCGH data from proband, carrier sister, and unaffected nephew are shown. Red ovals demarcate the probes that target the deleted locus.

### Figure B

#### **Fragment analysis of breakpoint PCR of the familial 2319-bp deletion encompassing exon 5 of the *HPRT1* gene.**

Figure shows an agarose gel with the deleted allele preferentially amplified in the proband and carrier sibling, while the normal allele did not amplify under the PCR conditions. Size ladder (Invitrogen 1 KB plus) is in the lane labeled as 1 kb+, while wild-type DNA in lane 1, proband DNA in lane 2, carrier sister's DNA in lane 3, and water in lane 4. The two alternative forward primers used in amplification are labeled as Fa and Fb. The expected sizes of fragments generated from normal wild type alleles are written on top of the gel and the sizes of the amplicons generated from deleted alleles are highlighted with an arrow on the right. Asterisks highlight the bands sequenced.

### Figure C

#### **Sequence from the deletion locus of the familial 2319-bp deletion encompassing exon 5 of the *HPRT1* gene.**

Sequence shows the breakpoints in relation to the adjoining sequence; repeat elements, SNPs, exons, and primers. Sequence coordinates are listed according to UCSC hg 18 build (March 2006), and the two interruptions demarcate the breakpoints. Nucleotides in bold and capitalized font represent exons. Nucleotides in bold and underlined font correspond to the primers used in breakpoint PCR. RepeatMasker are highlighted with blue font, SNPs (130 build) are highlighted in red font, and microhomology at breakpoints is shown boxed.

**Additional File 1, Figure A**

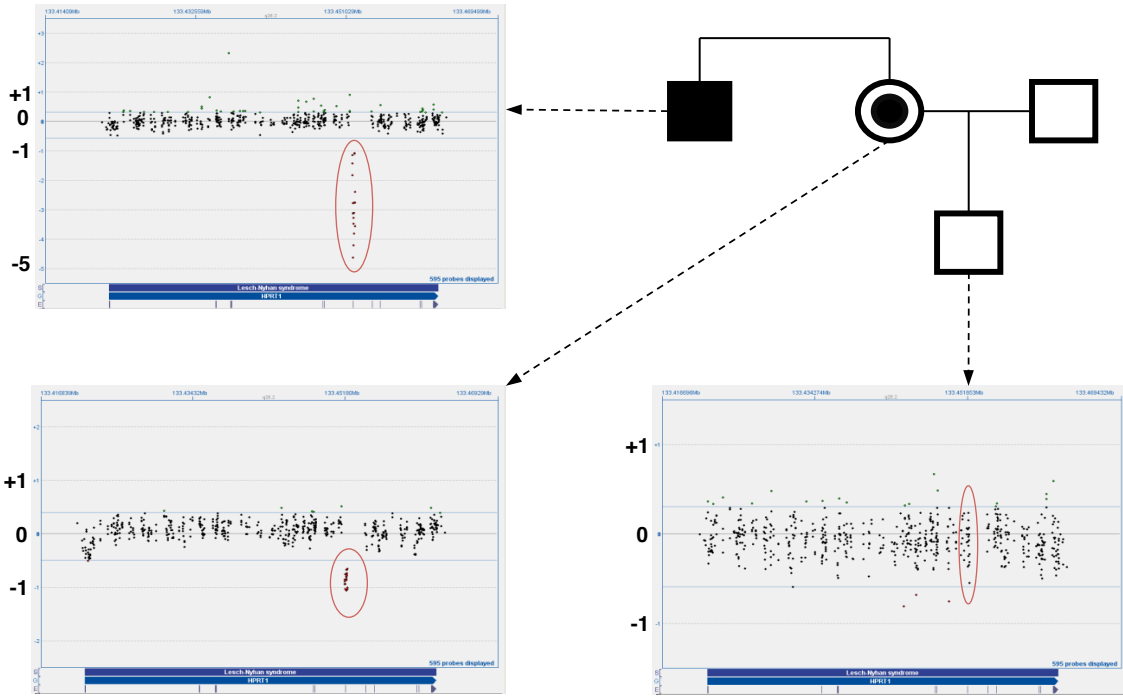

**Additional File 1, Figure B**

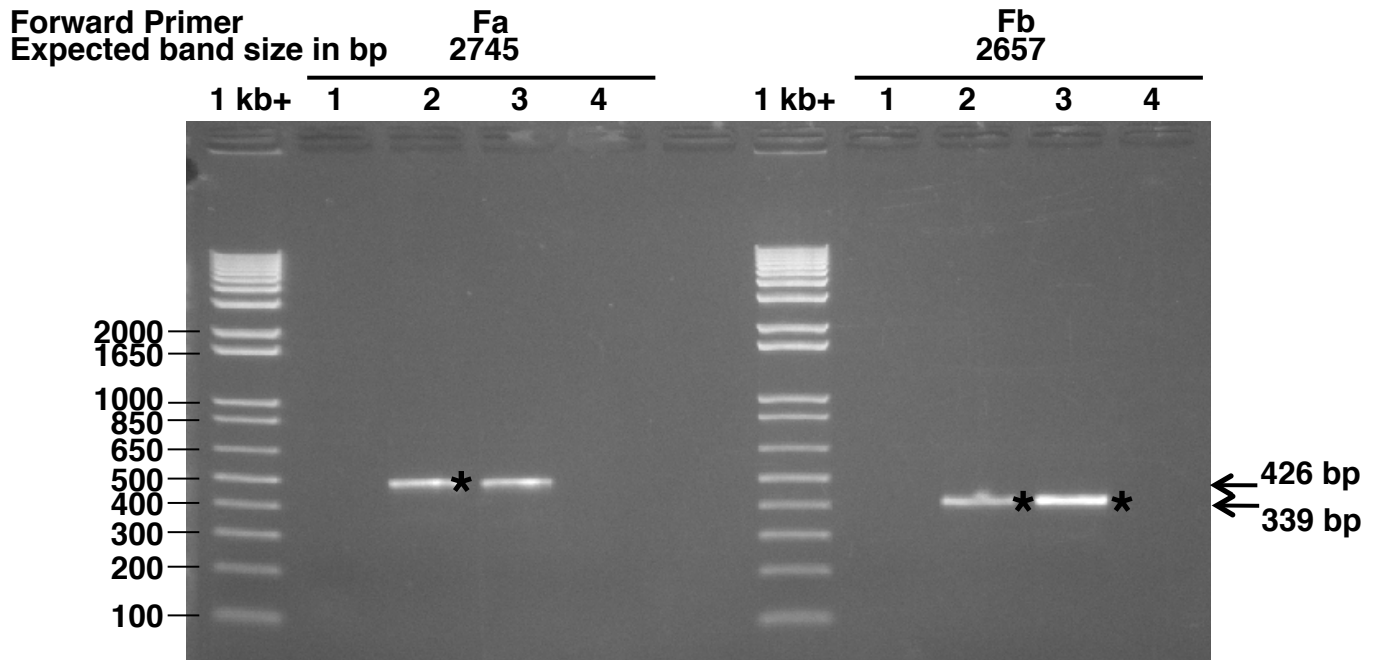

**Additional File 1, Figure C**

**chrX:133,451,101-133,453,900**

atatatagaacattaaaatcttaatgctatagttattatatgacagagtatga **Fa**  
tgagagctacagataaacaacacatcatgaatcttcttgtggcagtgttt  
ataaccattatgtgaaatgctgcctcattcttataactagcataagaac **Fb**  
gataggactttctcgattttgaggggtaattattagatggatTTTTCTGT  
taaggactcttccagctataaaattcttaaatgtagaaagcgaagtgagg  
gtttatggtgagaggaagcattggtatcatgttttagtgtagtccaaga

ta

**(Breakpoint @ chrX:133,451,403 in intron 4)**

tggacacatccagaaaatgcagatcaagtttagcctaagagaaaata  
tattttggagtcocatatggtaaattaaattatgtgatttttgagttattg  
tacaatatataattcttagaatgttagagtcaggagactataagagaccaa **MIR3**  
ctgcttcaagtttcatttaacacatgggaaactaaggcagagaaatttc  
aagacttgcccaagatttagacctcttggttaagtaatgaaagtgttttaa  
aacaggtgggtcaaattctgtttttaaaatttccattatgatgaaaattt  
cagtattacaggcttccaaatcccagcagatgggccacttgtttaagga  
gagtttgatataataaagcatctaaaacaagagtttgataattcctta  
gggttggtatgatgtgatttgacttataattggaaataccgttttattca  
ttgtactgattttcatttctcttttcttcttag**AATGTCTTGATTGTGGA** **Exon 5**  
**A**gtaagttcacatttacttttaataataacatttatgacttttctaactta  
gtatgcaccatcctaaaggtaagccagggagagaaattcctctgcatcag  
tttta-----1390 bp-----tcttc  
aattcacttggaccttttgcatttaattttaatttttatttttttaaga  
cagagtctcactctgtcaccaggctggagtgagtggtatgatctcagct **Alu**  
cactaactactctgcctcccagggtcaagcaattctcatgtctcagcctc **FLAM\_C**  
ccaagtagctgggactacaggtgtgcgccaccatgcttggttaattgtgt  
gtgtgtgtgtgtgtatgtatgtatgtatataatgtgtgtgtgtatata  
atatatacacacacataataaataatatacatatataatatacacac **TA-rich**  
atatataaatatatacaata **repeat**

**(Breakpoint @ chrX:133,453,721 in intron 4)**

tatatatacacacacacacacatatat  
atatatatagttttttttttttttaagtagagatggggtttgccatggt  
ggcaggtggtctggcctcaagccatcctcccacctcggcctcgcaaag  
tgctggtattatagcatgagccactgtgctggcctgcatttcatttta **R**
