# Supplementary material for: Detection limit of intragenic deletions with targeted array comparative genomic hybridization
Source: PubMed Central journal article supplement (PMC4235222; doi:10.1186/1471-2156-14-116), 2013-12-05
Supplement: 1471-2156-14-116-S2.pdf [file 1471-2156-14-116-S2.pdf]

## Additional File 2

### **Figure A. Fragment analysis of breakpoint PCR of the familial 1325-bp deletion encompassing exon 8 of the *STK11* gene.**

Figure shows an agarose gel with the deleted allele preferentially amplified in the proband. Size ladder (Invitrogen 1 KB plus) is in the lane labeled as 1 kb+, while wild-type DNA in lane 1, proband DNA in lane 2, and water in lane 3. The two alternative forward primers used in amplification are labeled as Fa and Fb. The expected sizes of fragments generated from normal wild type alleles are written on top of the gel and the sizes of the amplicons generated from deleted alleles are highlighted with an arrow on the right. Asterisks highlight the bands sequenced.

### **Figure B. Sequence from the deletion locus of the the familial 1325-bp deletion encompassing exon 8 of the *STK11* gene.**

Sequence shows the breakpoints in relation to the adjoining sequence; repeat elements, SNPs, exons, and primers. Sequence coordinates are listed according to UCSC hg 18 build (March 2006), and the two interruptions demarcate the breakpoints. Nucleotides in bold and capitalized font represent exons. Nucleotides in bold and underlined font correspond to the primers used in breakpoint PCR. SNPs (130 build) are highlighted in red font, and microhomology at breakpoints is shown boxed.

### **Figure C. Fragment analysis of breakpoint PCR of the familial 971-bp deletion encompassing exon 3 of the *STK11* gene.**

Figure shows an agarose gel with the deleted allele preferentially amplified in the proband with one of four reverse primers used. Size ladder (Invitrogen 1 KB plus) is in the lane labeled as 1 kb+, while wild-type DNA in lane 1, proband DNA in lane 2, and water in lane 3. The four alternative reverse primers used in amplification are labeled as Ra, Rb, Rc and Rd. The expected sizes of fragments generated from normal wild type alleles are written on top of the gel. The size of the amplicon generated from deleted allele, when amplified using Rd primer, is highlighted with an arrow on the right. Asterisks highlight the bands sequenced.

### **Figure D. Sequence from the deletion locus of the the familial 97-bp deletion encompassing exon 3 of the *STK11* gene.**

Sequence shows the breakpoints in relation to the adjoining sequence; repeat elements, SNPs, exons, and primers. Sequence coordinates are listed according to UCSC hg 18 build (March 2006), and the two interruptions demarcate the breakpoints. Nucleotides in bold and capitalized font represent exons. Nucleotides in bold and underlined font correspond to the primers used in breakpoint PCR. RepeatMasker are highlighted with blue font, SNPs (130 build) are highlighted in red font, and microhomology at breakpoints is shown boxed.

**Additional File 2, Figure A**

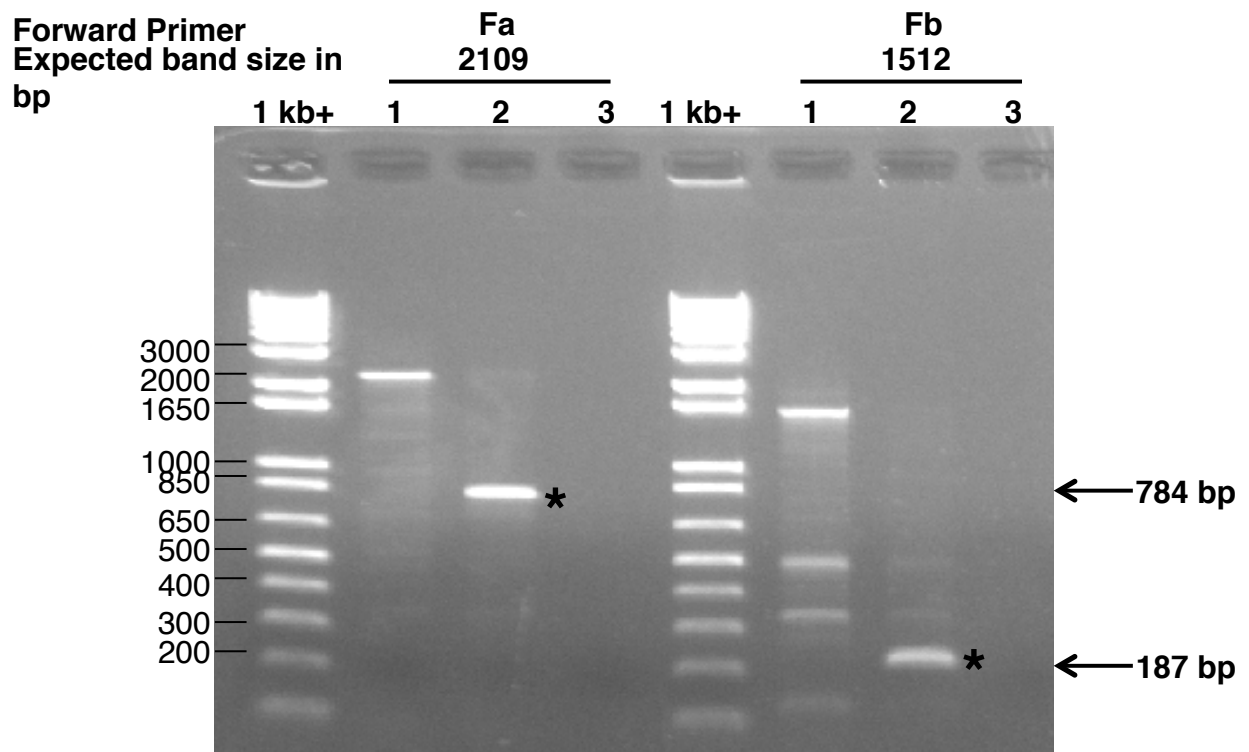

**Additional File 2, Figure B**

**chr19:1173251-1174850**

aggcatg**gagatgcgccaggaagg**gcacagctggtcccaaactggcga **Fb**  
gagcctctcttttttc**c**cctcctcctggggctcccagcagcaggggtgtggc  
tgggatccagcccagggcccccagctccatgacaggggaagacagagcagc  
Ggacgggggtcagcag

**(Breakpoint @ chr19:1,173,416 in intron 7)**

gccccacagtgcgcgctcctcacttc**g**tgggctc  
tgctcctctgcaccagcccctggaggcccttgagccgtctgctggagccc  
ctccgagccccgaggccaccactgagaccggctct**g**ggag**t**gggagtgt  
ccggaccctgaggcgtggtgctgattgtgccttgggggtctctgcaca  
gctcgggtcat**c**tgggcgctggcggggactggggctgcccccgatagc  
ctcctgggctgggatgtgctcagggcccccagacccccttctggcctt  
gctggctttgcagccagcatccatctggtgggtgctggcttctgagtgc  
acctgggacacaggcctcaggggtggagg**g**gacatctgtcaggcttggagt  
caggtcagcctgcctgctcctagaggacatggctgagcttctgtggtcac  
agccacccttgacggcctggtcc**c**agctcctgagtgtgtggcaggtac  
cctgggcccagaggagctgggtcggaaa**a**ctggaccgcccctggtgccagc  
ctgacaggcgccactgcttctgggcgtttgag**CTGGTTCCGGAAGAAAC**  
**ATCCTCCGGCTGAAGCACCAGTGCCCATCCCACCGAGCCAGACACCAAG** Exon 8  
**GACCGGTGGCGCAGCATGACTGTGGTGCCGTACTTGGAGGACCTGCACGG**  
**CGCGGACGAGGACGAGGACCTCTT**C**GACATCGAGGATGACATCATCTACA**  
**CTCAGGACTTCACGGTGCCCG**gtgagtctggcgggggcccctgcccggct  
ctgctgactcggccaggatgtcccacgggagcaggggtgctgctgctg  
caaca-----390 bp not shown-----aggcg  
tctgaggcagggccttagagcggagcgcggccttgacagaagagcagggctc  
Agacctttcaggagaggaagcctctcggccggcg**c**gag

**(Breakpoint @ chr19:1,174,740 in intron 8)**

tagtgctga  
ggaggagctcagggccttagcgtaggggcggcc**cacattggcagccagcc** **R**  
cctccccgcatgctcccggcttggctgtgttcggcccagggctgggccc

### Additional File 2, Figure C

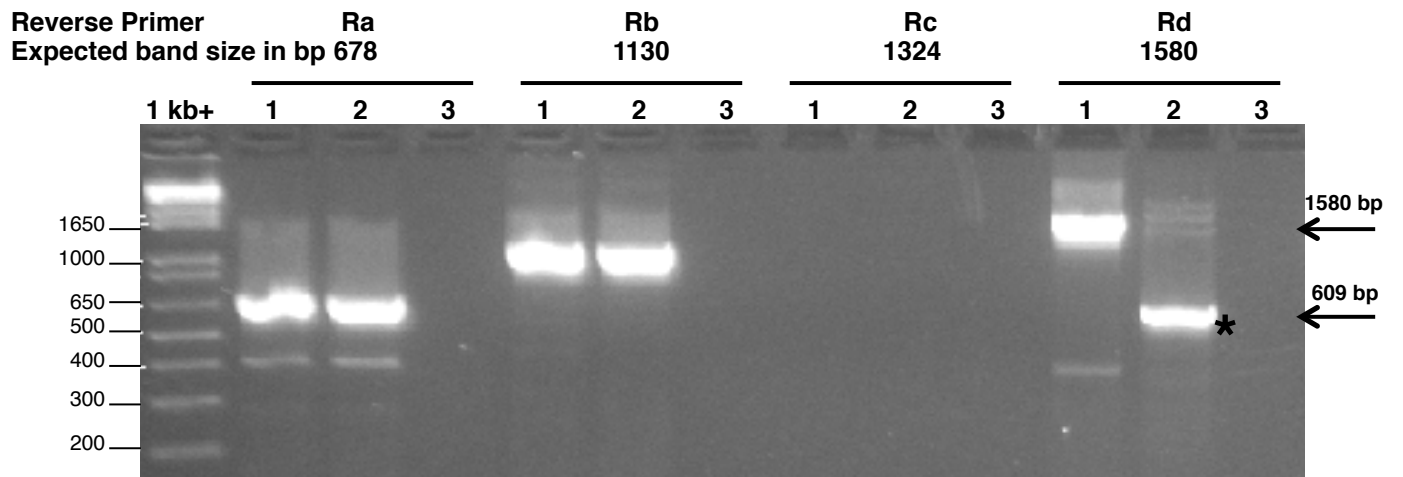

## Additional File 2, Figure D

chr19:1,169,801-1,171,400

cgggctgaccgttgaggccattttggtcgtaggctggggcgtgtcctcgtg **F**  
tcacatctgtggacacccccatgggtcttacgggacagcctccctacgggg  
actttgcttccctaaggccctgtgcccagagcaagagccagaagtggctcct  
gaggctggggctgtgttccctgagccacgcggtcaggggcccctgggaccg  
tcctgcatggggcccagcctgcttggggggcgtccaggaggcaccatcc  
ccgcccattgggcagggtggg

(Breakpoint @ chr19:1,170,072 in intron 2)

ggacgtgagccccgcaggaacgctgcccc  
aagagtcagccctgtcctccccctccccgtaggctccttctcctcctgggac  
gctggggcccctgggccttttcagaggggtggctgagggcagggtgggccc  
ctgggtcccagaggaggggcaaggtgggtgcagagggctccctccagagcccc  
ttttctggccccctgtcctcctgggcctgtgagtggggccgccccctgag  
ctgtgtgtccttagcgcccccacGTATATGGTGTGATGGAGTACTGCGTGTGT  
**GGCATGCAGGAAATGCTGGACAGCGTGCCGGAGAAGCGTTTCCCAGTGTG** Exon 3

**CCAGGCCACGG**gtgctgtgcgcggggcagggggccagggtggggcgggggc  
cgggggccaggcagggcaggctcctttccgtgaggccacactgctgtcc **Ra**

tgatattcattgacatgaaggcccaagttttttgtttttttgttttttt  
gtgttttttttcgagatggagtctcactctgtcgcccaggctggagtgca  
atggtgcatctcggctcactgcaagctccgcctccgaggttcacgccat **AluY**  
tcttctgcctcagcttcccagtagctgggattacaggcgcccgccacca  
cgcccggctaattttttgtatttttagtagagacggggtttcaccgtgtt  
agccaggatgggtctcaaacctcctgacctcgtgatccgcctgcctcagcct  
cccaaagtgtgggattacaggcatgagctaccacgcccggccttgtaaa

ggcccaagtttttaaaaacagttttgggggtcccccatgtgtggcatccac  
aggcagggtgctgccaacctccgcctccatctttgctgaggcctgctgc **Rb**  
ctgaggccagtggtcctgcttccagcccacgctggcagccgctgcctg  
accagatctcctggatgcaggctgtgtggcctcagagtcaggg

(Breakpoint @ chr19:1171042 in intron 3)

cccttgcc  
tgctgcaggaccacaggggcagggaggggcctgctgttccagcaagactt  
tgggggtgcagccggcctgtgagccacaggaatgagacctgtggacatc **Rc**  
cggggcccctgcccagacgtggctcggcgggacgaggggtggccactgcaggc  
gcagggtgtggctcctgctggacctagccttctcctctgtcctgtgtgct  
ggacttctgtgacttcccagctgggcctgtgggtgtttgggaggctcccag  
gcagctgcaaaggggacccccgtgtagggggcagggaggcctcggcccagg  
acgggtgtgtgctgcccgcagGTACTTCTGTCAGCTGATTGACGGCCTGG **Rd**
